# Supplementary material for: About the Transient Effects of Synthetic Amorphous Silica: An In Vitro Study on Macrophages
Source: MDPI journal article supplement (doi:10.3390/ijms24010220), 2022-12-22
Supplement: s1 [file s1]

## Supplementary Table S1

Results of the ANOVA+Tukey's pairwise test  
p value of the ANOVA: 0.00182

Tukey's Q values are reported below the diagonal, and p(same) values are reported above the diagonal

|     | SC | MC    | SPr   | MPr   | SPy   |       |
|-----|----|-------|-------|-------|-------|-------|
| SC  |    |       | 0.769 | 0.124 | 0.542 | 0.030 |
| MC  |    | 1.651 |       | 0.021 | 0.993 | 0.005 |
| SPr |    | 3.816 | 5.467 |       | 0.011 | 0.886 |
| MPr |    | 2.230 | 0.578 | 6.046 |       | 0.003 |
| SPy |    | 5.107 | 6.758 | 1.291 | 7.336 |       |
